# Supplementary material for: New Insights from 22-kHz Ultrasonic Vocalizations to Characterize Fear Responses: Relationship with Respiration and Brain Oscillatory Dynamics
Source: eNeuro. 2019 May 7;6(2):ENEURO.0065-19.2019. doi: 10.1523/ENEURO.0065-19.2019 (PMC6506822; doi:10.1523/ENEURO.0065-19.2019)
Supplement: Extended Data Figure 3-1 — Delta and Theta activity mean power statistical data: ANOVA analysis (upper table) and p values for post-hoc comparisons (lower table). * : p≤5x10-2, ** : p≤5x10-3, *** : p≤5x10-4. Download Figure 3-1, DOCX file. [file sup_enu-eN-NWR-0065-19-s04.docx]

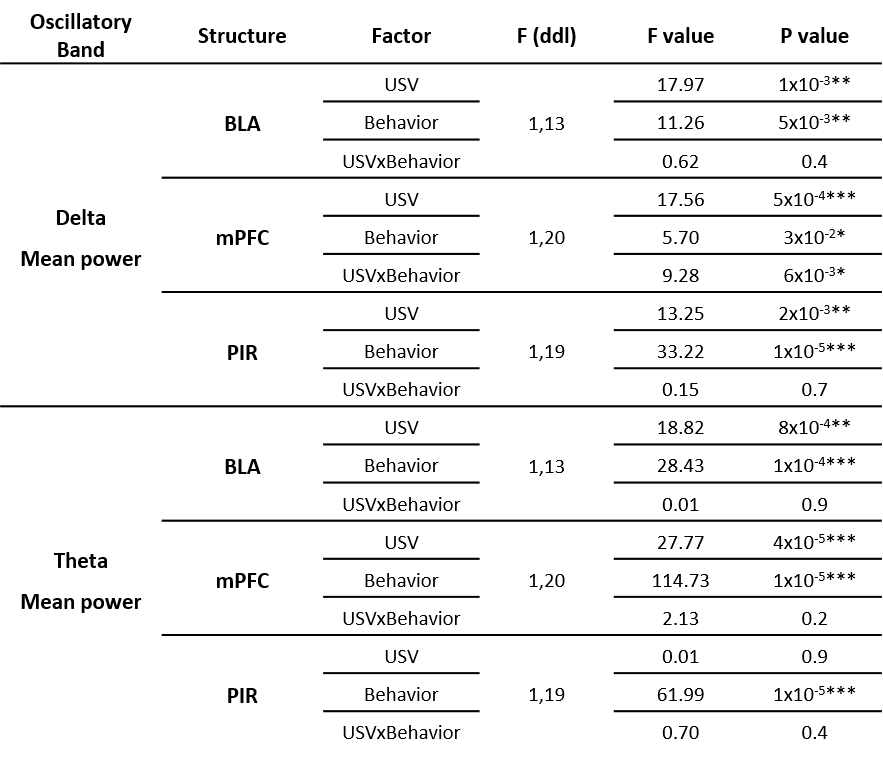

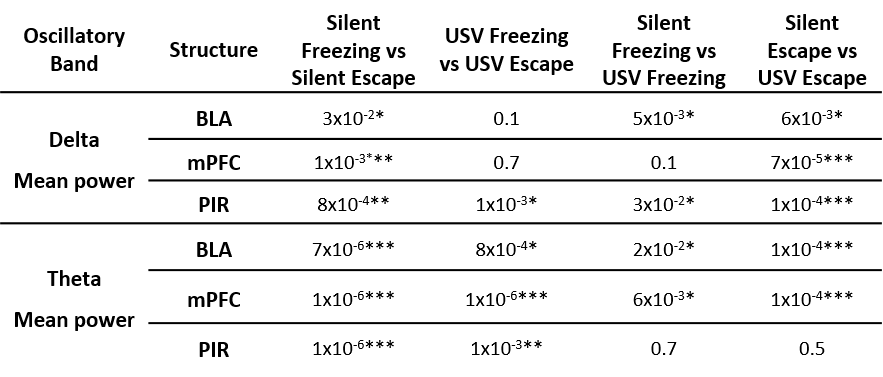


**Figure 3-1:** Delta and Theta activity mean power statistical data: ANOVA analysis (upper table) and p values for post-hoc comparisons (lower table).

* : p≤5x10-2, ** : p≤5x10-3, *** : p≤5x10-4.
